# Supplementary material for: Coordination Chemistry of Polynitriles, Part XII—Serendipitous Synthesis of the Octacyanofulvalenediide Dianion and Study of Its Coordination Chemistry with K+ and Ag+
Source: MDPI journal article supplement (doi:10.3390/inorganics11020071), 2023-02-02
Supplement: s1 [file s1]

Archive with 1 entries (1 files):
- inorganics-2191835-supplementary.pdf
