# Supplementary material for: Coordination Chemistry of Polynitriles, Part XII—Serendipitous Synthesis of the Octacyanofulvalenediide Dianion and Study of Its Coordination Chemistry with K+ and Ag+
Source: MDPI journal article supplement (doi:10.3390/inorganics11020071), 2023-02-02
Supplement: s1 [file s1 › inorganics-2191835-supplementary.pdf]

# Supporting Information

for

Coordination Chemistry of Polynitriles, Part XII. Serendipitous Synthesis of the Octacyanofulvalenediide dianion and Study of its Coordination Chemistry with  $K^+$  and  $Ag^+$

## Table of Contents

|                  |   |
|------------------|---|
| 1. TABLES .....  | 2 |
| 2. FIGURES ..... | 3 |

Es konnten keine Einträge für ein Abbildungsverzeichnis gefunden werden.

|                                                                                                                      |    |
|----------------------------------------------------------------------------------------------------------------------|----|
| Figure S 1: $^1H$ -NMR (400 MHz, DMSO- $d_6$ ) of the crude reaction product of reaction 4.2. ....                   | 3  |
| Figure S 2: $^{13}C\{^1H\}$ -NMR (101 MHz, DMSO- $d_6$ ) of the crude reaction product of reaction 4.2. ....         | 3  |
| Figure S 3: $^1H$ -NMR (400 MHz, DMSO- $d_6$ ) of the crude reaction product of reaction 4.3. ....                   | 4  |
| Figure S 4: $^{13}C\{^1H\}$ -NMR (101 MHz, DMSO- $d_6$ ) of the crude reaction product of reaction 4.3. ....         | 4  |
| Figure S 5: $^1H$ -NMR (400 MHz, DMSO- $d_6$ ) of the first chromatography fraction of reaction 4.4. ....            | 5  |
| Figure S 6: $^{13}C\{^1H\}$ -NMR (101 MHz, DMSO- $d_6$ ) of the first chromatography fraction of reaction 4.4. ....  | 5  |
| Figure S 7: $^{13}C\{^1H\}$ -NMR (101 MHz, DMSO- $d_6$ ) of the second chromatography fraction of reaction 4.4. .... | 6  |
| Figure S 8: $^1H$ -NMR (400 MHz, DMSO- $d_6$ ) of the purified product of reaction 4.6. ....                         | 6  |
| Figure S 9: $^{13}C\{^1H\}$ -NMR spectrum (101 MHz, DMSO- $d_6$ ) of the purified product of reaction 4.6. ....      | 7  |
| Figure S 10: The infinite 1D-chain in the structure of compound <b>1</b> . ....                                      | 7  |
| Figure S 11: ORTEP3 plot of the asymmetric unit of <b>4</b> , at r.t. ....                                           | 7  |
| Figure S 12: Two views of the pore structure of <b>4</b> , ....                                                      | 8  |
| Figure S 13: Two packing views of compound <b>4</b> , ....                                                           | 8  |
| Figure S 14: ORTEP3 view of the zigzag chain of face-fused $KN_4O_2$ octahedra along the $x$ -direction. ..          | 9  |
| Figure S 15: Packing plots of compound <b>6</b> (MERCURY, watched along $c$ ). ....                                  | 9  |
| Figure S 16: Packing plot of compound <b>6</b> (MERCURY, watched along $b$ ). ....                                   | 9  |
| Figure S 17: HOMO and LUMO of compound <b>1</b> , as calculated with <i>CrystalExplorer</i> . ....                   | 10 |
| Figure S 18: Electron Density plot of compound <b>1</b> . ....                                                       | 10 |
| Figure S 19: Two views of the electrostatic potential distribution in compound <b>1</b> . ....                       | 10 |

## 1. TABLES

Table S 1: Important bond parameters of compound **4** (room temperature determination)

| Bond                | Length [Å]/<br>Angle[°] | Bond                             | Length [Å]/<br>Angle [°] |
|---------------------|-------------------------|----------------------------------|--------------------------|
| Ag1–N1              | 2.261(5)                | Ag1–N2'                          | 2.268(4)                 |
| Ag1–N3'             | 2.339(5)                | Ag1–N4'                          | 2.345(5)                 |
| (C–C) <sub>cp</sub> | 1.400(6) –<br>1.422(6)  | C <sub>cp</sub> –C <sub>CN</sub> | 1.413(6) –<br>1.426(6)   |
| (C–N)               | 1.124(7) –<br>1.138(6)  | C4–C4'                           | 1.461(7)                 |
| C1–C6–N1            | 178.0(6)                | C2–C7–N2                         | 178.5(6)                 |
| C3–C8–N3            | 176.8(7)                | C5–C9–N4                         | 177.3(7)                 |
| Ag1–N1–C6           | 170.5(5)                | Ag1–N2–C7                        | 170.6(5)                 |
| Ag1–N3–C8           | 165.9(6)                | Ag1–N5–C9                        | 165.7(6)                 |
| C3–C4–C4'–C3'       | -122.4(5)               |                                  |                          |

## 2. FIGURES

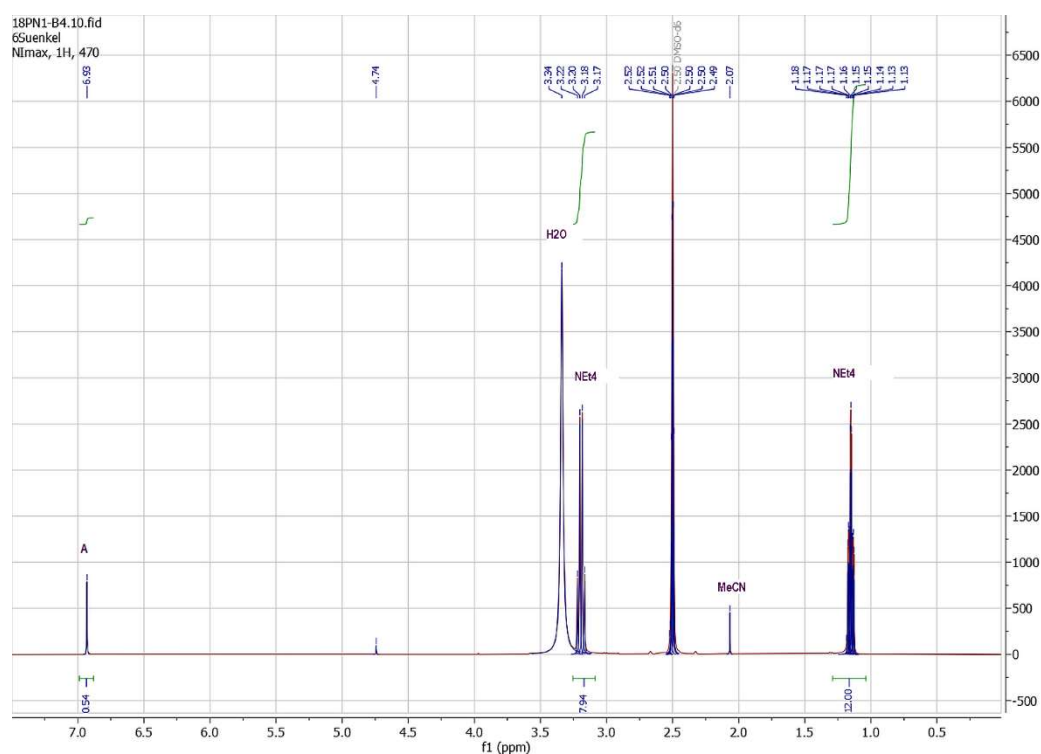

Figure S 1:  $^1\text{H}$ -NMR (400 MHz,  $\text{DMSO-d}_6$ ) of the crude reaction product of reaction 4.2.

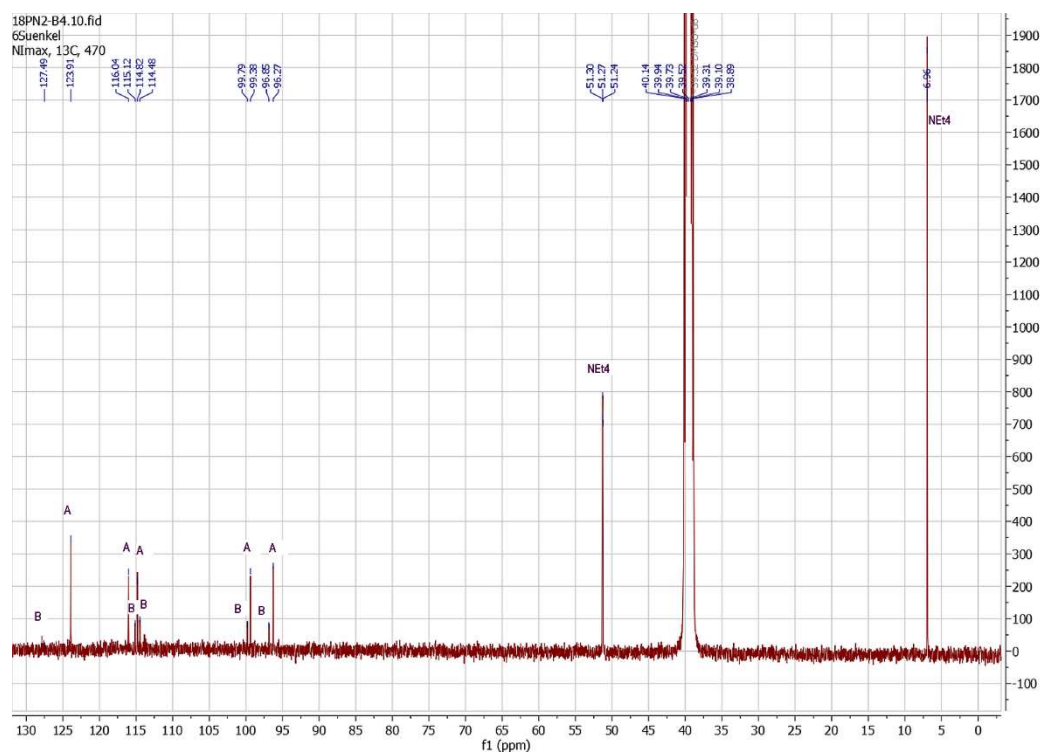

Figure S 2:  $^{13}\text{C}\{^1\text{H}\}$ -NMR (101 MHz,  $\text{DMSO-d}_6$ ) of the crude reaction product of reaction 4.2.

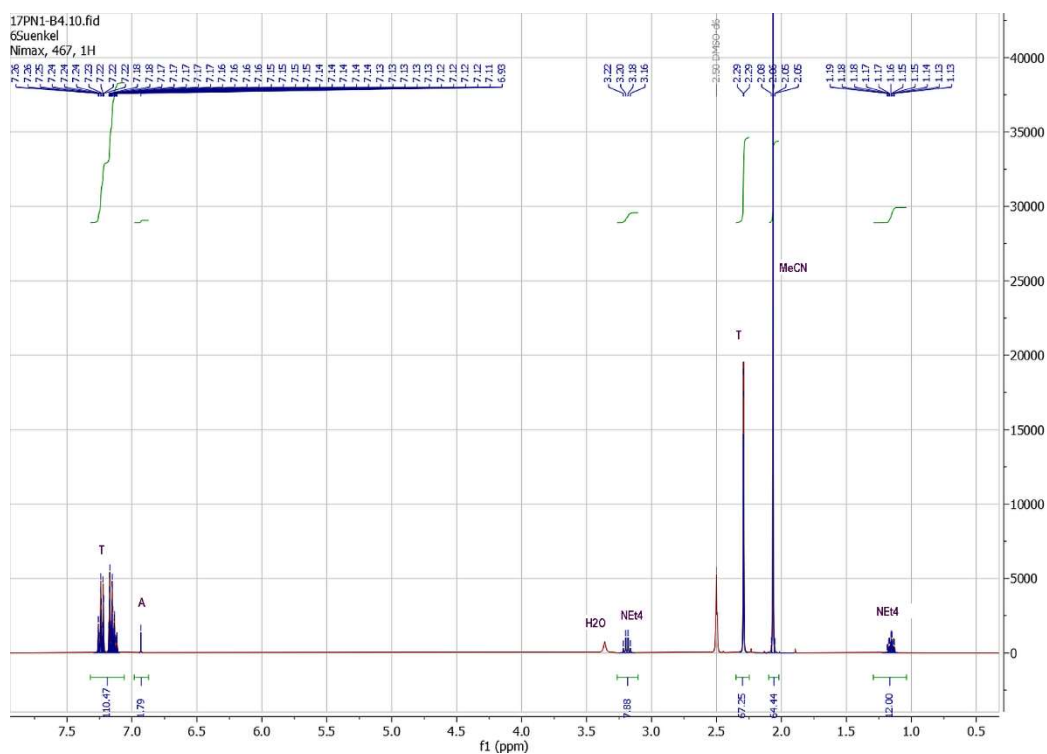

Figure S 3:  $^1\text{H}$ -NMR (400 MHz,  $\text{DMSO-d}_6$ ) of the crude reaction product of reaction 4.3. (T= toluene)

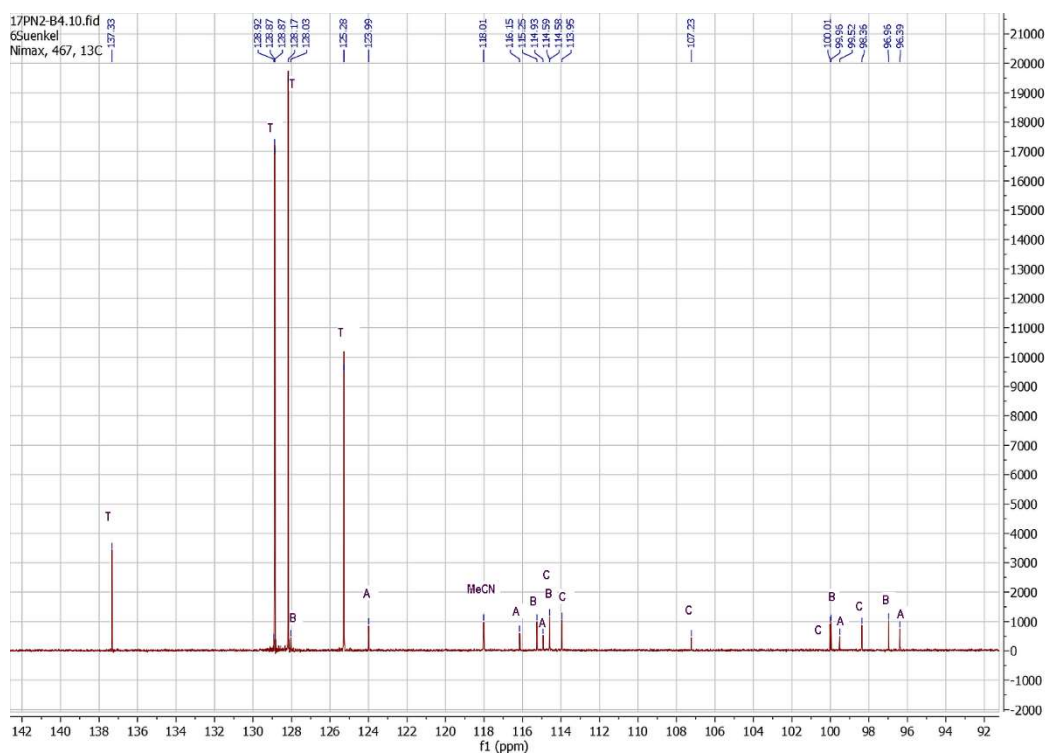

Figure S 4:  $^{13}\text{C}\{^1\text{H}\}$ -NMR (101 MHz,  $\text{DMSO-d}_6$ ) of the crude reaction product of reaction 4.3. (T=toluene)

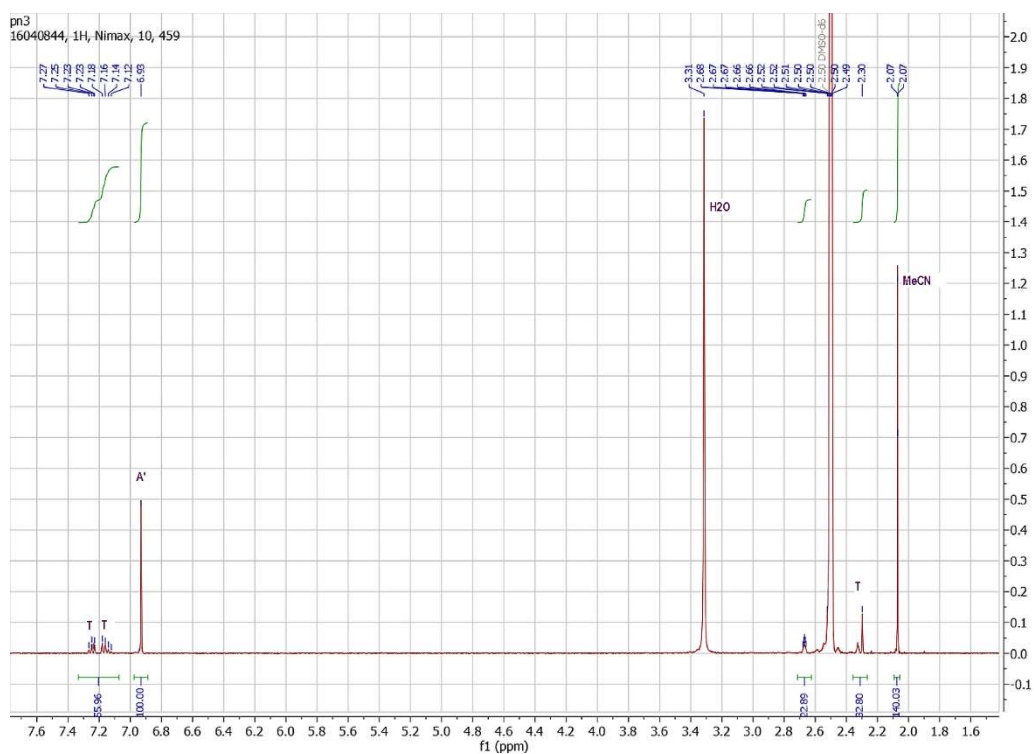

Figure S 5:  $^1\text{H}$ -NMR (400 MHz,  $\text{DMSO-d}_6$ ) of the first chromatography fraction of reaction 4.4. (T=toluene)

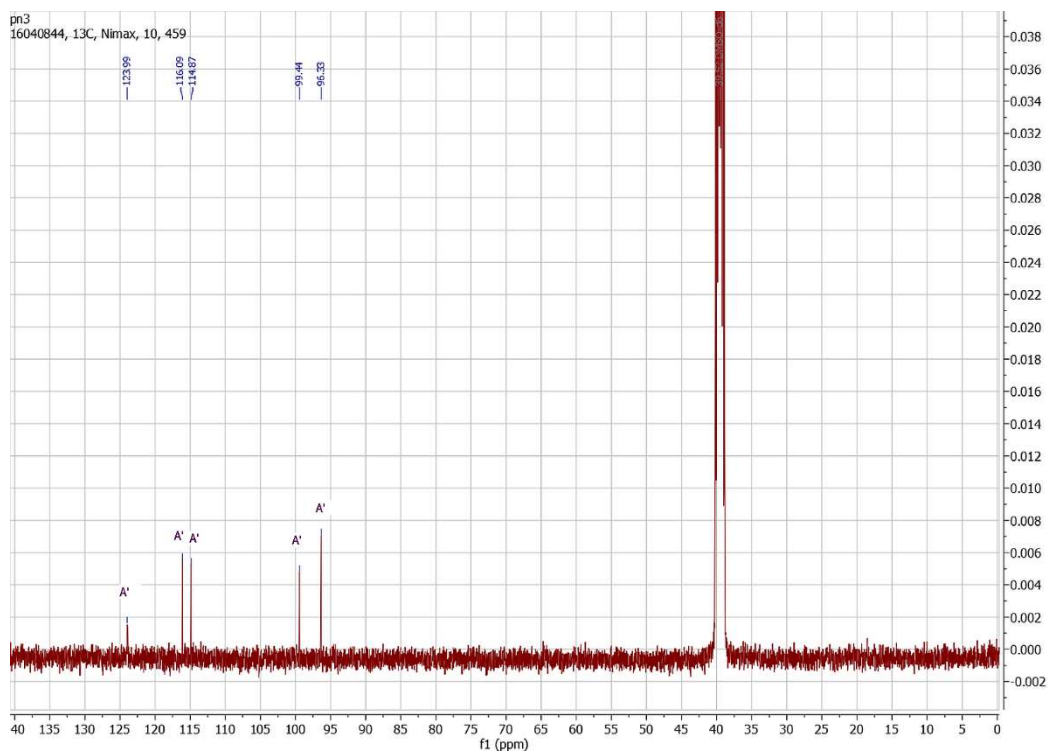

Figure S 6:  $^{13}\text{C}\{^1\text{H}\}$ -NMR (101 MHz,  $\text{DMSO-d}_6$ ) of the first chromatography fraction of reaction 4.4.

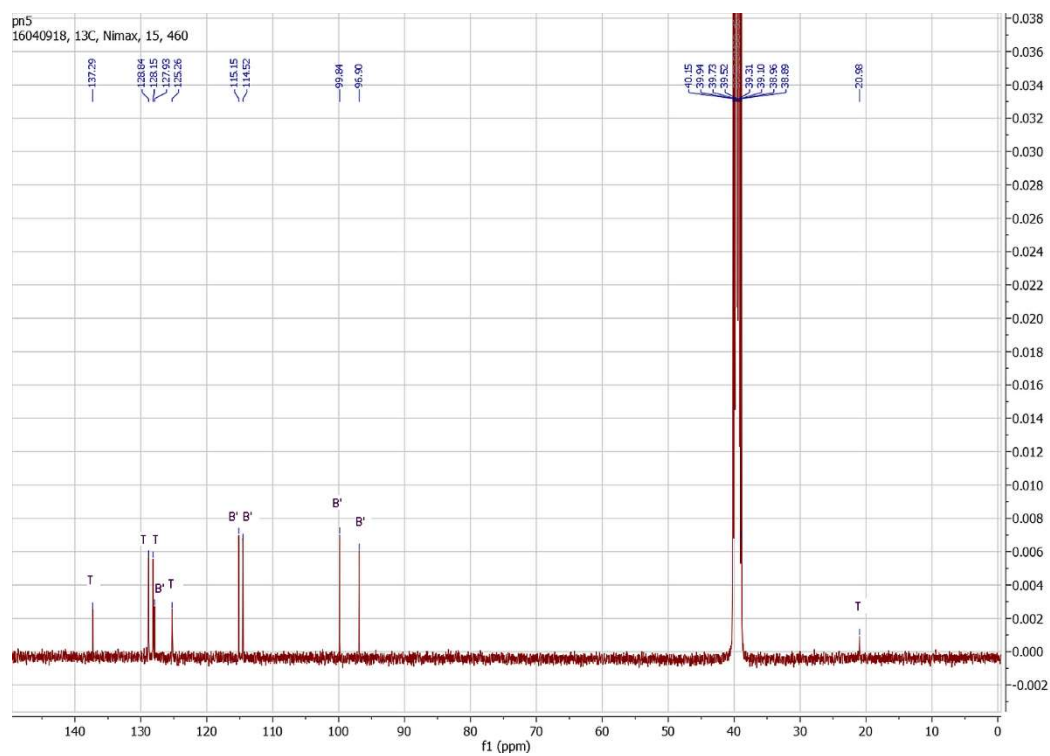

Figure S 7:  $^{13}\text{C}\{^1\text{H}\}$ -NMR (101 MHz,  $\text{DMSO-d}_6$ ) of the second chromatography fraction of reaction 4.4 (T= toluene)

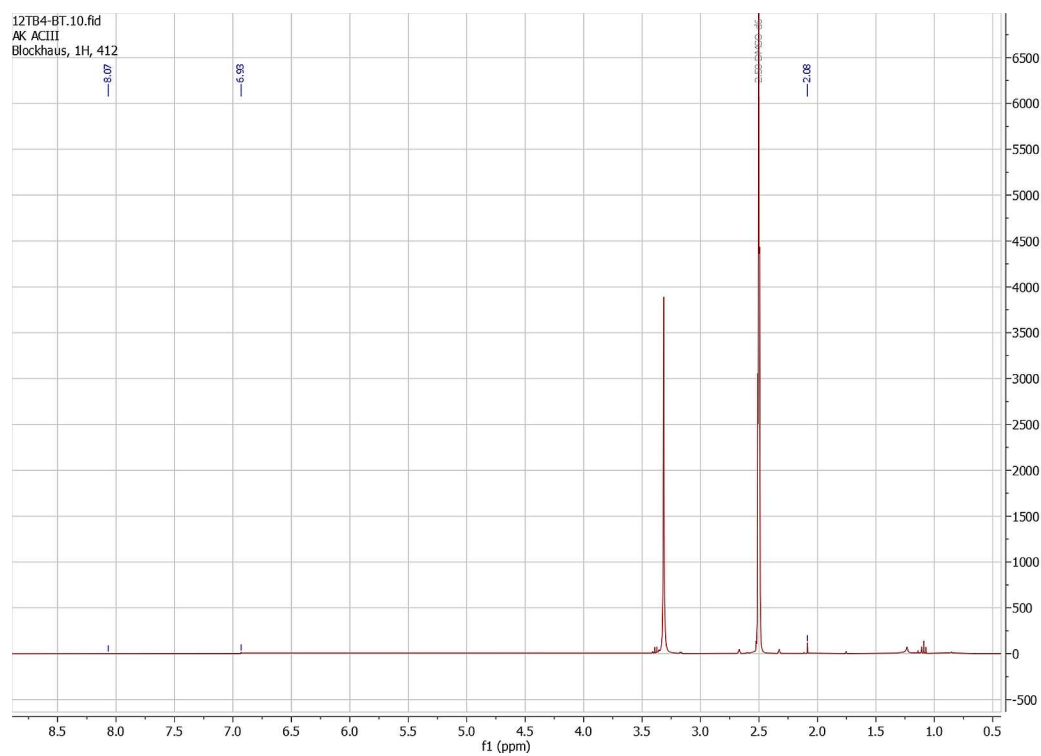

Figure S 8:  $^1\text{H}$ -NMR (400 MHz,  $\text{DMSO-d}_6$ ) of the purified product of reaction 4.6.

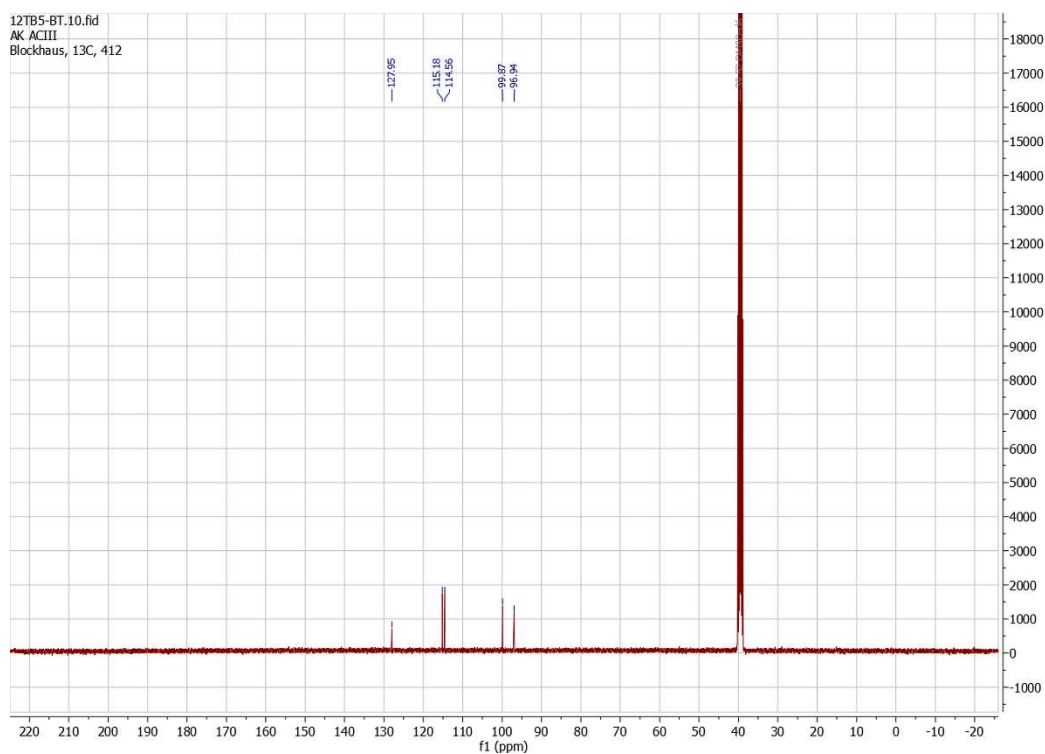

Figure S 9:  $^{13}\text{C}\{^1\text{H}\}$ -NMR spectrum (101 Mhz,  $\text{DMSO-d}_6$ ) of the purified product of reaction 4.6.

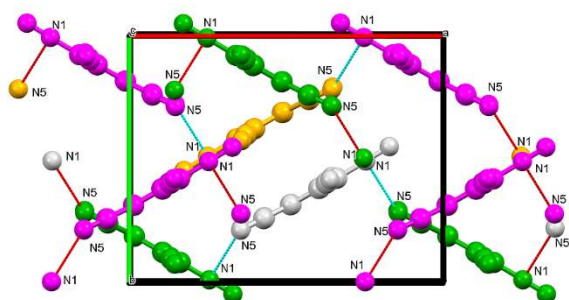

Figure S 10: The infinite 1D-chain in the structure of compound **1**. MERCURY plot, color “by symmetry operation”, standard settings

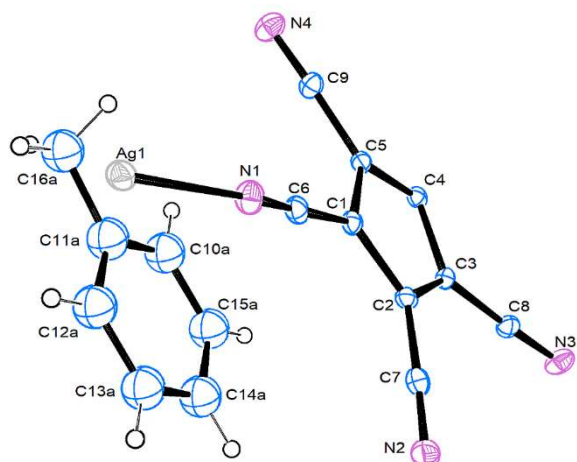

Figure S 11: ORTEP3 plot of the asymmetric unit of **4**, at r.t.

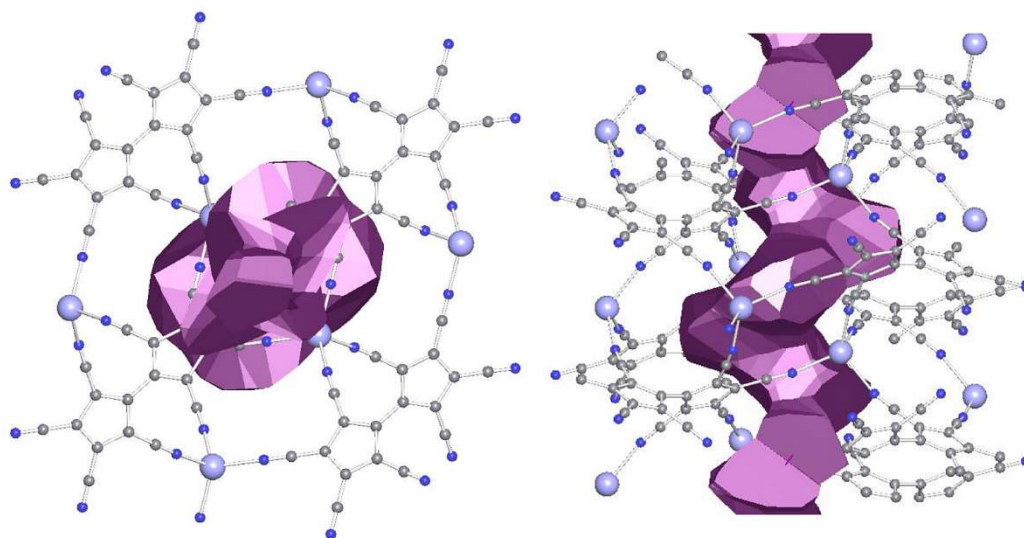

Figure S 12: Two views of the pore structure of **4**, generated by virtual removing the disordered toluenes.

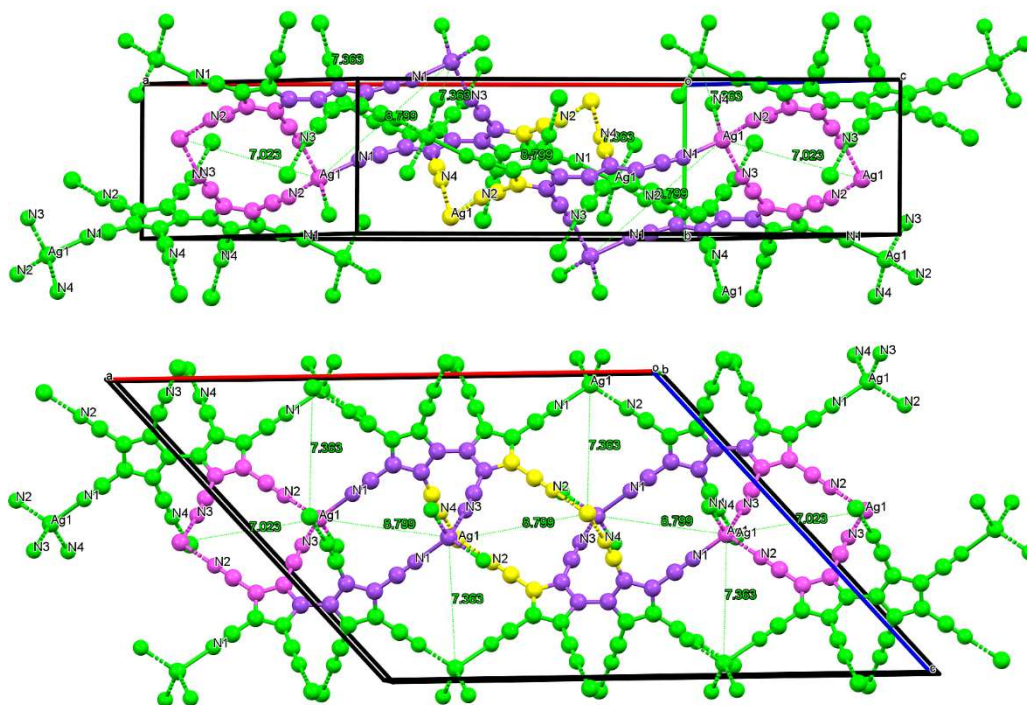

Figure S 13: Two packing views of compound **4**, showing the formation of 14-membered rings involving nitrile nitrogens N2 and N3 (lilac) and 20-membered rings involving N3 and N4 (lilac + purple) or N2 and N4 (yellow + purple), with Ag...Ag distances across the rings given.



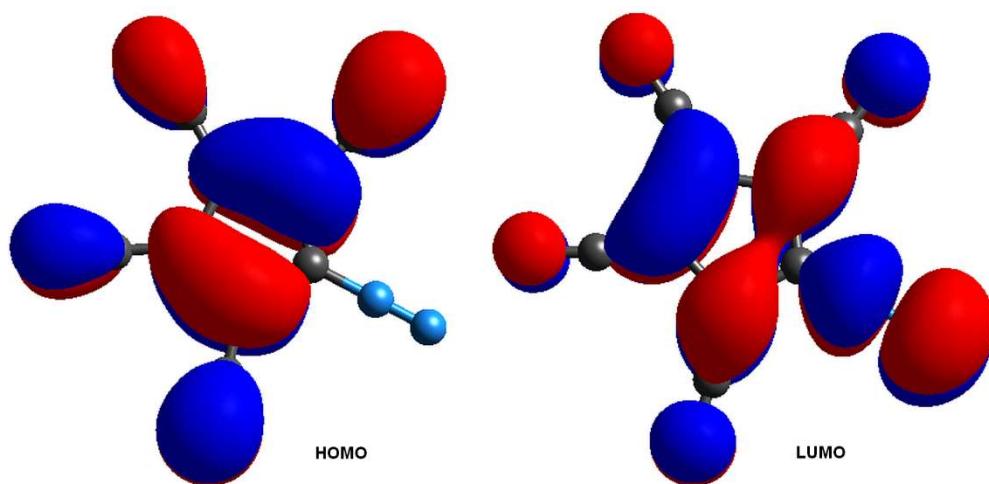

Figure S 17: HOMO and LUMO of compound **1**, as calculated with *CrystalExplorer*

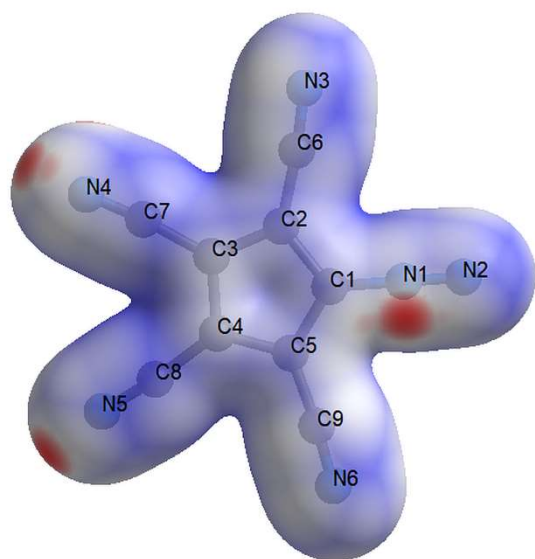

Figure S 18: Electron Density plot of compound **1** (red patches correspond to positive charges)

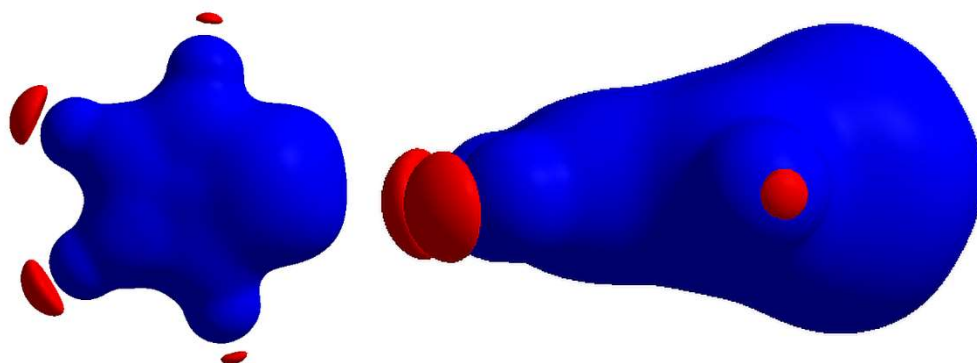

Figure S 19: Two views of the electrostatic potential distribution in compound **1**
